# Supplementary material for: Indigo alleviates psoriasis through the AhR/NF-κB signaling pathway: an in vitro and in vivo study
Source: PeerJ. 2024 Oct 21;12:e18326. doi: 10.7717/peerj.18326 (PMC11505883; doi:10.7717/peerj.18326)
Supplement: Supplemental Information 1 [file peerj-12-18326-s001.xlsx]

## Sheet: Sheet1
ITEM TO CHECK	IMPORTANCE	CHECKLIST
EXPERIMENTAL DESIGN
Deﬁnition of experimental and control groups	E	Page 6/line237-238
Number within each group	E	Page 7/line238-239
Assay carried out by core lab or investigator's lab?	D
Acknowledgement of authors'contributions	D
SAMPLE
Description	E	Page 7/line238-241
Volume/mass of sample processed	D
Microdissection or macrodissection	E	Page 7/line241-242
Processing procedure	E	Page 7/line242-243
If frozen - how and how quickly?	E	Page 7/line242-243
If ﬁxed - with what, how quickly?	E	Page 7/line242-243
Sample storage conditions and duration (especially for FFPE samples)	E	Page 7/line252
NUCLEIC ACID EXTRACTION
Procedure and/or instrumentation	E	Page 7/line242-246
Name of kit and details of any modiﬁcations	E	Page 7/line242-246
Source of additional reagents used	D	Page 7/line242-246
Details of DNase or RNAse treatment DNA	E	Page 7/line247-249
Contamination assessment (DNA or RNA)	E	Page 7/line244-246
Nucleic acid quantiﬁcation	E	Page 7/line243-245
Instrument and method	E	Page 7/line243-245
Purity (A260/A280) (A260/A280)	D	Page 7/line243-245
Yield	D
RNA integrity method/instrument RNA	E	Page 7/line243-246
RIN/RQI or Cq of 3' and 5' transcripts	E	Page 7/line243-246
Electrophoresis traces	D
Inhibition testing (Cq dilutions, spike or other)	E	Page 7/line243-246
REVERSE TRANSCRIPTION
Complete reaction conditions	E	Page 7/line249-252
Amount of RNA and reaction volume	E	Page 7/line249
Priming oligonucleotide (if using GSP) and concentration	E	Page 7/line249-250
Reverse transcriptase and concentration	E	Page 7/line248-249
Temperature and time	E	Page 7/line251
Manufacturer of reagents and catalogue numbers	D	Page 7/line247-252
Cqs with and without RT	D*
Storage conditions of cDNA	D	Page 7/line252
qPCR TARGET INFORMATION
If multiplex, efﬁciency and LOD of each assay.	E	Page 7/line263-264
Sequence accession number	E	Page 7/line260-261
Location of amplicon	D
Amplicon length	E	Page 7/line260-261
In silico speciﬁcity screen (BLAST, etc) Pseudogenes, retropseudogenes or other homologs? Sequence alignment	E	Page 7/line260-261
	D
	D
Secondary structure analysis of amplicon	D
Location of each primer by exon or intron (if applicable)	E	Page 7/line260-261
What splice variants are targeted?	E	Page 7/line260-261
qPCR OLIGONUCLEOTIDES
Primer sequences	E	Page 7/line260-261
RTPrimerDB Identiﬁcation Number RTPrimerDB	D
Probe sequences	D**
Location and identity of any modiﬁcations	E	Page 7/line260-261
Manufacturer of oligonucleotides	D	Page 7/line260-261
Puriﬁcation method	D	Page 7/line260-261
qPCR PROTOCOL
Complete reaction conditions	E	Page 7/line257-258
Reaction volume and amount of cDNA/DNA CDNA/DNA	E	Page 7/line255
Primer, (probe), Mg++ and dNTP concentrations	E	Page 7/line255
Polymerase identity and concentration	E	Page 7/line255
Buffer/kit identity and manufacturer	E	Page 7/line255
Exact chemical constitution of the buffer	D
Additives (SYBR Green I, DMSO, etc.)	E	Page 7/line254
Manufacturer of plates/tubes and catalog number	D
Complete thermocycling parameters	E	Page 7/line257-258
Reaction setup (manual/robotic)	D
Manufacturer of qPCR instrument	E	Page 7/line256
qPCR VALIDATION
Evidence of optimisation (from gradients)	D
Speciﬁcity (gel, sequence, melt, or digest)	E	Page 7/line258-260
For SYBR Green I, Cq of the NTC	E	Page 7/line258-260
Standard curves with slope and y-intercept	E	Page 7/line258-260
PCR efﬁciency calculated from slope	E	Page 7/line263-264
Conﬁdence interval for PCR efﬁciency or standard error	D	Page 7/line263-265
r2 of standard curve	E	Page 7/line263-264
Linear dynamic range	E	Page 7/line263-264
Cq variation at lower limit	E	Page 7/line263-265
Conﬁdence intervals throughout range	D
Evidence for limit of detection	E	Page 7/line264-265
If multiplex, efﬁciency and LOD of each assay	E	Page 7/line264-265
DATA ANALYSIS
qPCR analysis program (source, version)	E	Page 7/line261-263
Cq method determination	E	Page 7/line261-263
Outlier identiﬁcation and disposition	E	Page 7/line261-263
Results of NTCs	E	Page 7/line261-263
Justiﬁcation of number and choice of reference genes	E	Page 7/line261-263
Description of normalisation method	E	Page 7/line261-263
Number and concordance of biological replicates	D
Number and stage (RT or qPCR) of technical replicates	E	Page 7/line265-266
Repeatability (intra-assay variation)	E	Page 7/line266-267
Reproducibility (inter-assay variation, %CV)	D
Power analysis	D
Statistical methods for result signiﬁcance	E	Page 8/line 286-292
Software (source, version)	E	Page 8/line 286-292
Cq or raw data submission using RDML	D
*: Assessing the absence of DNA using a no RT assay is essential when ﬁrst extracting RNA. Once the sample has been validated as RDNA-free, inclusion of a no-RT control is desirable, but no longer essential.
**: Disclosure of the probe sequence is highly desirable and strongly encouraged. However, since not all commercial pre-designed assay vendors provide this information, it cannot be an essential requirement. Use of such assays is advised against.
